# Supplementary material for: Breast cancer risk factors and their effects on survival: a Mendelian randomisation study
Source: Springer Nature journal article supplement (doi:10.1186/s12916-020-01797-2), 2020-11-17
Supplement: MOESM2 [file 18595086]

**Table S4. Mammographic density**

| SNP*       | Chr | Pos       | Effect allele | Other allele | EAF   | Mammographic density GWAS |       |          | Breast cancer-specific: All |       |          | Breast cancer-specific: ER-positive |       |          | Breast cancer-specific: ER-negative |       |          |
|------------|-----|-----------|---------------|--------------|-------|---------------------------|-------|----------|-----------------------------|-------|----------|-------------------------------------|-------|----------|-------------------------------------|-------|----------|
|            |     |           |               |              |       | Beta                      | SE    | P-value  | Beta                        | SE    | P-value  | Beta                                | SE    | P-value  | Beta                                | SE    | P-value  |
| rs10995190 | 10  | 64278682  | A             | G            | 0.147 | -0.240                    | 0.031 | 1.00E-16 | -0.005                      | 0.024 | 8.44E-01 | 0.039                               | 0.031 | 2.16E-01 | -0.093                              | 0.050 | 6.12E-02 |
| rs10034692 | 4   | 75419787  | A             | G            | 0.719 | -0.160                    | 0.031 | 2.00E-10 | -0.017                      | 0.019 | 3.83E-01 | -0.010                              | 0.024 | 6.78E-01 | -0.019                              | 0.038 | 6.22E-01 |
| rs1033556  | 12  | 103011894 | A             | G            | 0.979 | -0.410                    | 0.082 | 4.00E-10 | 0.154                       | 0.055 | 5.37E-03 | 0.097                               | 0.071 | 1.70E-01 | 0.189                               | 0.108 | 8.15E-02 |
| rs12665607 | 6   | 151946629 | A             | T            | 0.085 | -0.170                    | 0.040 | 2.00E-08 | 0.080                       | 0.029 | 6.31E-03 | 0.078                               | 0.038 | 3.98E-02 | 0.037                               | 0.057 | 5.11E-01 |
| rs7289126  | 22  | 38628306  | A             | C            | 0.458 | -0.110                    | 0.020 | 3.00E-08 | -0.022                      | 0.017 | 1.97E-01 | -0.018                              | 0.022 | 4.19E-01 | -0.065                              | 0.034 | 5.79E-02 |

\* Total number of SNPs after harmonization and filtering from originally 12 SNPs

SNP: Single Nucleotide Polymorphism  
 Chr: Chromosome  
 Pos: Position  
 EAF: Effect Allele Frequency  
 SE: Standard Error



Table S6. Menopause

| SNP*       | Chr | Pos       | Effect allele | Other allele | EAF   | Menopause GWAS |       |          | Breast cancer-specific: All |       |          | Breast cancer-specific: ER-positive |       |          | Breast cancer-specific: ER-negative |       |          |
|------------|-----|-----------|---------------|--------------|-------|----------------|-------|----------|-----------------------------|-------|----------|-------------------------------------|-------|----------|-------------------------------------|-------|----------|
|            |     |           |               |              |       | Beta           | SE    | P-value  | Beta                        | SE    | P-value  | Beta                                | SE    | P-value  | Beta                                | SE    | P-value  |
| rs11668344 | 19  | 55833664  | G             | A            | 0.349 | -0.410         | 0.020 | 5.00E-05 | 0.012                       | 0.018 | 4.89E-01 | 0.002                               | 0.023 | 9.47E-01 | -0.006                              | 0.035 | 8.56E-01 |
| rs4693089  | 4   | 84373622  | A             | G            | 0.508 | -0.200         | 0.020 | 9.00E-23 | 0.000                       | 0.017 | 9.78E-01 | -0.001                              | 0.022 | 9.57E-01 | 0.000                               | 0.034 | 9.90E-01 |
| rs2720044  | 8   | 37980587  | A             | C            | 0.838 | -0.290         | 0.031 | 7.00E-22 | -0.014                      | 0.023 | 5.32E-01 | 0.016                               | 0.029 | 5.91E-01 | -0.052                              | 0.046 | 2.56E-01 |
| rs2277339  | 12  | 57146069  | G             | T            | 0.097 | -0.310         | 0.031 | 2.00E-19 | -0.025                      | 0.028 | 3.81E-01 | -0.036                              | 0.037 | 3.28E-01 | -0.046                              | 0.058 | 4.29E-01 |
| rs930036   | 2   | 171941018 | A             | G            | 0.361 | -0.190         | 0.020 | 3.00E-19 | 0.011                       | 0.017 | 5.36E-01 | 0.006                               | 0.022 | 7.85E-01 | 0.032                               | 0.035 | 3.71E-01 |
| rs6856993  | 4   | 185748806 | A             | G            | 0.574 | -0.160         | 0.020 | 1.00E-16 | -0.008                      | 0.017 | 6.56E-01 | 0.002                               | 0.022 | 9.31E-01 | -0.012                              | 0.035 | 7.36E-01 |
| rs4886238  | 13  | 81113739  | A             | G            | 0.341 | 0.180          | 0.020 | 3.00E-16 | 0.004                       | 0.018 | 8.41E-01 | 0.017                               | 0.023 | 4.49E-01 | -0.015                              | 0.036 | 6.74E-01 |
| rs704795   | 2   | 27716494  | A             | G            | 0.405 | -0.160         | 0.020 | 2.00E-15 | -0.019                      | 0.017 | 2.86E-01 | -0.016                              | 0.022 | 4.70E-01 | -0.042                              | 0.036 | 2.39E-01 |
| rs707938   | 6   | 31729359  | G             | A            | 0.311 | -0.170         | 0.020 | 7.00E-15 | 0.021                       | 0.018 | 2.43E-01 | 0.028                               | 0.023 | 2.34E-01 | 0.013                               | 0.036 | 7.18E-01 |
| rs2236918  | 1   | 242017826 | C             | G            | 0.441 | -0.150         | 0.020 | 8.00E-14 | -0.018                      | 0.017 | 2.86E-01 | -0.014                              | 0.022 | 5.19E-01 | -0.029                              | 0.035 | 4.13E-01 |
| rs11031006 | 11  | 30226528  | G             | A            | 0.858 | -0.220         | 0.031 | 9.00E-14 | 0.018                       | 0.024 | 4.52E-01 | 0.004                               | 0.031 | 8.90E-01 | 0.043                               | 0.049 | 3.87E-01 |
| rs763121   | 22  | 38879940  | G             | A            | 0.344 | -0.160         | 0.020 | 2.00E-13 | -0.033                      | 0.019 | 6.57E-02 | -0.050                              | 0.023 | 3.00E-02 | -0.016                              | 0.036 | 6.56E-01 |
| rs2241584  | 5   | 175956177 | A             | G            | 0.385 | -0.140         | 0.020 | 2.00E-11 | 0.010                       | 0.017 | 5.58E-01 | -0.013                              | 0.022 | 5.76E-01 | 0.057                               | 0.035 | 1.06E-01 |
| rs1800932  | 2   | 48018081  | A             | G            | 0.829 | -0.170         | 0.031 | 3.00E-11 | -0.014                      | 0.022 | 5.24E-01 | 0.005                               | 0.028 | 8.61E-01 | -0.050                              | 0.043 | 2.44E-01 |
| rs1799949  | 17  | 41245466  | G             | A            | 0.674 | -0.140         | 0.020 | 8.00E-11 | 0.012                       | 0.018 | 4.87E-01 | 0.030                               | 0.023 | 2.05E-01 | -0.030                              | 0.036 | 3.99E-01 |
| rs1411478  | 1   | 180962282 | A             | G            | 0.411 | -0.130         | 0.020 | 1.00E-10 | -0.006                      | 0.017 | 7.20E-01 | -0.023                              | 0.022 | 3.10E-01 | 0.028                               | 0.035 | 4.20E-01 |
| rs9796     | 15  | 41271447  | T             | A            | 0.439 | -0.130         | 0.020 | 1.00E-10 | -0.032                      | 0.017 | 6.86E-02 | -0.036                              | 0.022 | 1.09E-01 | -0.043                              | 0.035 | 2.21E-01 |
| rs1713460  | 14  | 20933615  | G             | A            | 0.303 | -0.140         | 0.020 | 2.00E-10 | 0.005                       | 0.018 | 7.99E-01 | -0.007                              | 0.024 | 7.76E-01 | 0.033                               | 0.037 | 3.83E-01 |
| rs2236553  | 20  | 81289743  | C             | T            | 0.227 | -0.160         | 0.031 | 6.00E-10 | 0.034                       | 0.031 | 2.79E-01 | 0.041                               | 0.040 | 3.06E-01 | 0.082                               | 0.068 | 3.58E-01 |
| rs2230365  | 6   | 31525448  | C             | T            | 0.849 | -0.170         | 0.031 | 8.00E-10 | -0.063                      | 0.023 | 5.80E-03 | -0.076                              | 0.029 | 9.79E-03 | -0.065                              | 0.046 | 1.59E-01 |
| rs2941505  | 17  | 37832704  | A             | G            | 0.320 | -0.130         | 0.020 | 2.00E-09 | -0.011                      | 0.018 | 5.60E-01 | 0.002                               | 0.034 | 9.52E-01 | 0.079                               | 0.055 | 1.50E-01 |
| rs8070740  | 17  | 5331896   | A             | G            | 0.754 | -0.150         | 0.020 | 2.00E-09 | -0.010                      | 0.019 | 5.99E-01 | -0.004                              | 0.023 | 8.75E-01 | 0.012                               | 0.036 | 7.47E-01 |
| rs16858210 | 3   | 183624010 | G             | A            | 0.752 | -0.140         | 0.020 | 3.00E-09 | -0.028                      | 0.019 | 1.50E-01 | -0.032                              | 0.025 | 1.94E-01 | 0.007                               | 0.040 | 8.56E-01 |
| rs10957156 | 8   | 61629401  | A             | G            | 0.762 | -0.140         | 0.020 | 5.00E-09 | 0.028                       | 0.020 | 1.55E-01 | 0.019                               | 0.026 | 4.55E-01 | 0.031                               | 0.041 | 4.52E-01 |
| rs451417   | 20  | 5941999   | A             | C            | 0.124 | -0.200         | 0.031 | 5.00E-09 | -0.006                      | 0.026 | 8.07E-01 | -0.023                              | 0.033 | 4.96E-01 | 0.012                               | 0.052 | 8.13E-01 |
| rs5762534  | 22  | 28633571  | T             | C            | 0.840 | -0.160         | 0.031 | 6.00E-09 | -0.015                      | 0.023 | 5.08E-01 | -0.011                              | 0.030 | 7.21E-01 | -0.054                              | 0.047 | 2.46E-01 |
| rs11738223 | 5   | 171934492 | A             | G            | 0.674 | -0.120         | 0.020 | 2.00E-08 | 0.022                       | 0.018 | 2.19E-01 | 0.025                               | 0.023 | 2.84E-01 | 0.018                               | 0.037 | 6.23E-01 |
| rs4879656  | 9   | 33012382  | A             | C            | 0.366 | -0.120         | 0.020 | 2.00E-08 | 0.010                       | 0.018 | 5.71E-01 | 0.006                               | 0.023 | 7.78E-01 | -0.003                              | 0.035 | 9.23E-01 |
| rs12599106 | 16  | 34498025  | A             | T            | 0.496 | -0.120         | 0.020 | 3.00E-08 | -0.018                      | 0.025 | 4.74E-01 | 0.006                               | 0.031 | 8.35E-01 | 0.006                               | 0.048 | 8.99E-01 |
| rs8039     | 16  | 9205363   | C             | T            | 0.279 | -0.120         | 0.020 | 3.00E-08 | -0.004                      | 0.019 | 8.47E-01 | -0.006                              | 0.032 | 8.43E-01 | -0.044                              | 0.049 | 3.81E-01 |
| rs12196873 | 6   | 111598058 | A             | C            | 0.848 | -0.160         | 0.031 | 3.00E-08 | -0.005                      | 0.024 | 8.24E-01 | -0.018                              | 0.024 | 4.55E-01 | 0.029                               | 0.039 | 4.56E-01 |
| rs10905065 | 10  | 5769827   | A             | G            | 0.606 | -0.110         | 0.020 | 4.00E-08 | 0.012                       | 0.017 | 4.88E-01 | 0.018                               | 0.022 | 4.22E-01 | 0.011                               | 0.035 | 7.51E-01 |
| rs7259376  | 19  | 22507705  | G             | A            | 0.539 | 0.110          | 0.020 | 4.00E-08 | -0.012                      | 0.017 | 4.85E-01 | 0.014                               | 0.024 | 5.61E-01 | -0.039                              | 0.038 | 3.02E-01 |
| rs551087   | 12  | 121209193 | A             | G            | 0.715 | 0.130          | 0.020 | 4.00E-08 | -0.018                      | 0.019 | 3.35E-01 | -0.016                              | 0.022 | 4.81E-01 | -0.022                              | 0.035 | 5.37E-01 |

\* Total number of SNPs after harmonization and filtering from originally 51 SNPs

SNP: Single Nucleotide Polymorphism  
 Chr: Chromosome  
 Pos: Position  
 EAF: Effect Allele Frequency  
 SE: Standard Error

**Table S7. Physical activity**

| SNP*       | Chr | Pos      | Effect allele | Other allele | EAF   | Physical activity GWAS |       |          | Breast cancer-specific: All |       |          | Breast cancer-specific: ER-positive |       |           | Breast cancer-specific: ER-negative |       |          |
|------------|-----|----------|---------------|--------------|-------|------------------------|-------|----------|-----------------------------|-------|----------|-------------------------------------|-------|-----------|-------------------------------------|-------|----------|
|            |     |          |               |              |       | Beta                   | SE    | P-value  | Beta                        | SE    | P-value  | Beta                                | SE    | P-value   | Beta                                | SE    | P-value  |
| rs55657917 | 17  | 43844560 | T             | G            | 0.787 | -0.037                 | 0.005 | 8.00E-12 | -0.015                      | 0.021 | 4.79E-01 | -0.044                              | 0.027 | 0.1028055 | 0.069                               | 0.042 | 1.03E-01 |
| rs59499656 | 18  | 40768309 | A             | T            | 0.655 | -0.028                 | 0.005 | 2.00E-09 | -0.009                      | 0.018 | 6.19E-01 | -0.024                              | 0.023 | 0.3041047 | 0.027                               | 0.037 | 4.60E-01 |
| rs6775319  | 3   | 18758501 | A             | T            | 0.276 | 0.027                  | 0.005 | 4.00E-08 | -0.021                      | 0.019 | 2.74E-01 | -0.025                              | 0.025 | 0.299366  | 0.006                               | 0.039 | 4.60E-01 |

\* Total number of SNPs after harmonization and filtering from originally 7 SNPs

SNP: Single Nucleotide Polymorphism  
 Chr: Chromosome  
 Pos: Position  
 EAF: Effect Allele Frequency  
 SE: Standard Error







Table S10. Body mass index European-specific

| SNP        | Chr | Pos       | Effect allele | Other allele | EAF   | BMI-European GWAS |       |           | Breast cancer-specific: All |       |          |
|------------|-----|-----------|---------------|--------------|-------|-------------------|-------|-----------|-----------------------------|-------|----------|
|            |     |           |               |              |       | Beta              | SE    | P-value   | Beta                        | SE    | P-value  |
| rs10132280 | 14  | 25928179  | A             | C            | 0.333 | -0.023            | 0.003 | 1.14E-11  | -0.012                      | 0.019 | 5.23E-01 |
| rs1016287  | 2   | 59305625  | T             | C            | 0.325 | 0.023             | 0.003 | 2.25E-11  | 0.002                       | 0.019 | 9.16E-01 |
| rs10182181 | 2   | 25150296  | A             | G            | 0.500 | -0.031            | 0.003 | 8.78E-24  | 0.001                       | 0.023 | 9.61E-01 |
| rs10733682 | 9   | 129460914 | A             | G            | 0.425 | 0.017             | 0.003 | 1.83E-08  | 0.020                       | 0.017 | 2.42E-01 |
| rs10938397 | 4   | 45182527  | A             | G            | 0.567 | -0.040            | 0.003 | 3.21E-38  | -0.027                      | 0.017 | 1.15E-01 |
| rs10968576 | 9   | 28414339  | G             | A            | 0.292 | 0.025             | 0.003 | 6.61E-14  | 0.010                       | 0.018 | 5.89E-01 |
| rs11030104 | 11  | 27684517  | A             | G            | 0.800 | 0.041             | 0.004 | 5.56E-28  | 0.005                       | 0.021 | 8.15E-01 |
| rs11057405 | 12  | 122781897 | A             | G            | 0.092 | -0.031            | 0.006 | 2.02E-08  | 0.006                       | 0.039 | 8.82E-01 |
| rs11165643 | 1   | 96924097  | C             | T            | 0.425 | -0.022            | 0.003 | 2.07E-12  | 0.026                       | 0.023 | 2.58E-01 |
| rs1167827  | 7   | 75163169  | A             | G            | 0.458 | -0.020            | 0.003 | 6.33E-10  | 0.014                       | 0.017 | 4.17E-01 |
| rs11727676 | 4   | 145659064 | C             | T            | 0.075 | -0.036            | 0.006 | 2.55E-08  | -0.060                      | 0.039 | 1.26E-01 |
| rs12286929 | 11  | 115022404 | G             | A            | 0.433 | 0.022             | 0.003 | 1.31E-12  | 0.012                       | 0.018 | 4.84E-01 |
| rs12429545 | 13  | 54102206  | G             | A            | 0.900 | -0.033            | 0.005 | 1.09E-12  | -0.036                      | 0.033 | 2.88E-01 |
| rs12940622 | 17  | 78615571  | A             | G            | 0.458 | -0.018            | 0.003 | 2.49E-09  | 0.016                       | 0.023 | 4.96E-01 |
| rs12986742 | 2   | 58975143  | C             | T            | 0.500 | 0.021             | 0.004 | 1.01E-08  | -0.009                      | 0.017 | 6.12E-01 |
| rs13078960 | 3   | 85807590  | T             | G            | 0.817 | -0.030            | 0.004 | 1.74E-14  | 0.014                       | 0.021 | 5.11E-01 |
| rs13107325 | 4   | 103188709 | C             | T            | 0.883 | -0.048            | 0.007 | 1.83E-12  | 0.047                       | 0.036 | 1.85E-01 |
| rs13191362 | 6   | 163033350 | A             | G            | 0.800 | 0.028             | 0.005 | 7.34E-09  | 0.050                       | 0.036 | 1.67E-01 |
| rs1516725  | 3   | 185824004 | T             | C            | 0.092 | -0.045            | 0.005 | 1.89E-22  | -0.004                      | 0.026 | 8.73E-01 |
| rs1528435  | 2   | 181550962 | T             | C            | 0.583 | 0.018             | 0.003 | 1.20E-08  | -0.013                      | 0.018 | 4.67E-01 |
| rs1558902  | 16  | 53803574  | A             | T            | 0.450 | 0.082             | 0.003 | 7.51E-153 | -0.013                      | 0.017 | 4.42E-01 |
| rs16851483 | 3   | 141275436 | G             | T            | 0.908 | -0.048            | 0.008 | 3.55E-10  | 0.020                       | 0.035 | 5.64E-01 |
| rs16951275 | 15  | 68077168  | C             | T            | 0.225 | -0.031            | 0.004 | 1.91E-17  | 0.037                       | 0.020 | 6.54E-02 |
| rs17001654 | 4   | 77129568  | C             | G            | 0.842 | -0.031            | 0.005 | 7.76E-09  | -0.048                      | 0.024 | 4.65E-02 |
| rs17066856 | 18  | 58049656  | C             | T            | 0.133 | -0.040            | 0.006 | 6.23E-13  | -0.019                      | 0.029 | 5.22E-01 |
| rs17094222 | 10  | 102395440 | C             | T            | 0.208 | 0.025             | 0.004 | 5.94E-11  | -0.006                      | 0.021 | 7.68E-01 |
| rs17405819 | 8   | 76806584  | C             | T            | 0.367 | -0.022            | 0.003 | 2.07E-11  | -0.034                      | 0.019 | 6.30E-02 |
| rs17724992 | 19  | 18454825  | A             | G            | 0.692 | 0.019             | 0.004 | 3.42E-08  | 0.004                       | 0.019 | 8.45E-01 |
| rs1808579  | 18  | 21104888  | T             | C            | 0.475 | -0.017            | 0.003 | 4.17E-08  | -0.008                      | 0.017 | 6.51E-01 |
| rs1928295  | 9   | 120378483 | C             | T            | 0.425 | -0.019            | 0.003 | 7.91E-10  | 0.007                       | 0.017 | 6.87E-01 |
| rs2033732  | 8   | 85079709  | C             | T            | 0.758 | 0.019             | 0.004 | 4.89E-08  | 0.002                       | 0.020 | 9.12E-01 |
| rs205262   | 6   | 34563164  | A             | G            | 0.733 | -0.022            | 0.004 | 1.75E-10  | -0.023                      | 0.019 | 2.16E-01 |
| rs2121279  | 2   | 143043285 | T             | C            | 0.117 | 0.025             | 0.004 | 2.31E-08  | -0.013                      | 0.026 | 6.06E-01 |
| rs2176598  | 11  | 43864278  | T             | C            | 0.200 | 0.020             | 0.004 | 2.97E-08  | 0.001                       | 0.019 | 9.76E-01 |
| rs2207139  | 6   | 50845490  | G             | A            | 0.100 | 0.045             | 0.004 | 4.13E-29  | 0.010                       | 0.023 | 6.67E-01 |
| rs2245368  | 7   | 76608143  | T             | C            | 0.758 | -0.032            | 0.006 | 3.19E-08  | 0.016                       | 0.029 | 5.90E-01 |
| rs2287019  | 19  | 46202172  | C             | T            | 0.850 | 0.036             | 0.004 | 4.59E-18  | -0.004                      | 0.022 | 8.63E-01 |
| rs2303223  | 16  | 31075175  | A             | G            | 0.375 | -0.018            | 0.003 | 3.67E-09  | -0.017                      | 0.017 | 3.28E-01 |
| rs2365389  | 3   | 61236462  | C             | T            | 0.658 | 0.020             | 0.003 | 1.63E-10  | -0.021                      | 0.017 | 2.21E-01 |
| rs2820292  | 1   | 201784287 | A             | C            | 0.492 | -0.020            | 0.003 | 1.83E-10  | -0.029                      | 0.017 | 8.87E-02 |
| rs29941    | 19  | 34309532  | A             | G            | 0.333 | -0.018            | 0.003 | 2.41E-08  | 0.013                       | 0.018 | 4.60E-01 |
| rs3736485  | 15  | 51748610  | A             | G            | 0.425 | 0.018             | 0.003 | 7.41E-09  | -0.003                      | 0.017 | 8.46E-01 |
| rs3817334  | 11  | 47650993  | C             | T            | 0.550 | -0.026            | 0.003 | 5.15E-17  | -0.035                      | 0.023 | 1.35E-01 |
| rs3849570  | 3   | 81792112  | A             | C            | 0.367 | 0.019             | 0.003 | 2.60E-08  | 0.020                       | 0.018 | 2.64E-01 |
| rs3888190  | 16  | 28889486  | A             | C            | 0.358 | 0.031             | 0.003 | 3.14E-23  | 0.028                       | 0.017 | 1.12E-01 |
| rs4740619  | 9   | 15634326  | T             | C            | 0.533 | 0.018             | 0.003 | 4.56E-09  | 0.020                       | 0.017 | 2.54E-01 |
| rs543874   | 1   | 177889480 | G             | A            | 0.267 | 0.048             | 0.004 | 2.62E-35  | 0.031                       | 0.021 | 1.52E-01 |
| rs6477694  | 9   | 111932342 | C             | T            | 0.358 | 0.017             | 0.003 | 2.67E-08  | 0.012                       | 0.018 | 4.95E-01 |
| rs6567160  | 18  | 57829135  | C             | T            | 0.283 | 0.056             | 0.004 | 3.93E-53  | 0.048                       | 0.020 | 1.53E-02 |
| rs657452   | 1   | 49589847  | A             | G            | 0.417 | 0.023             | 0.003 | 5.48E-13  | -0.015                      | 0.018 | 4.05E-01 |
| rs6656785  | 1   | 75005776  | G             | A            | 0.383 | 0.022             | 0.003 | 3.83E-12  | 0.016                       | 0.018 | 3.59E-01 |
| rs6804842  | 3   | 25106437  | A             | G            | 0.425 | -0.019            | 0.003 | 2.48E-09  | -0.063                      | 0.023 | 6.12E-03 |
| rs7138803  | 12  | 50247468  | G             | A            | 0.558 | -0.032            | 0.003 | 8.15E-24  | 0.015                       | 0.018 | 3.99E-01 |
| rs7141420  | 14  | 79899454  | T             | C            | 0.617 | 0.024             | 0.003 | 1.23E-14  | 0.000                       | 0.023 | 9.90E-01 |
| rs758747   | 16  | 3627358   | C             | T            | 0.733 | -0.023            | 0.004 | 7.47E-10  | 0.015                       | 0.020 | 4.61E-01 |
| rs7599312  | 2   | 213413231 | G             | A            | 0.708 | 0.022             | 0.003 | 1.17E-10  | 0.022                       | 0.019 | 2.63E-01 |
| rs7899106  | 10  | 87410904  | A             | G            | 0.950 | -0.040            | 0.007 | 2.96E-08  | 0.025                       | 0.040 | 5.36E-01 |
| rs879620   | 16  | 4015729   | C             | T            | 0.408 | -0.024            | 0.004 | 1.06E-09  | 0.031                       | 0.018 | 8.25E-02 |
| rs9400239  | 6   | 108977663 | C             | T            | 0.700 | 0.019             | 0.003 | 1.61E-08  | -0.010                      | 0.019 | 5.95E-01 |
| rs9579083  | 13  | 28017270  | G             | C            | 0.767 | -0.030            | 0.005 | 3.46E-10  | 0.054                       | 0.022 | 1.29E-02 |
| rs9926784  | 16  | 19941968  | T             | C            | 0.792 | 0.027             | 0.004 | 1.85E-10  | 0.000                       | 0.022 | 9.89E-01 |

Data source: [https://portals.broadinstitute.org/collaboration/giant/index.php/GIANT\\_consortium\\_data\\_files#GWAS\\_Anthropometric\\_2015\\_BMI\\_Summary\\_Statistics](https://portals.broadinstitute.org/collaboration/giant/index.php/GIANT_consortium_data_files#GWAS_Anthropometric_2015_BMI_Summary_Statistics)

SNP: Single Nucleotide Polymorphism  
 Chr: Chromosome  
 Pos: Position  
 EAF: Effect Allele Frequency  
 SE: Standard Error



|            |    |           |   |   |       |       |       |          |        |       |          |
|------------|----|-----------|---|---|-------|-------|-------|----------|--------|-------|----------|
| rs4804833  | 19 | 7970635   | A | G | 0.390 | 0.021 | 0.008 | 7.70E-13 | 0.019  | 0.017 | 3.96E-01 |
| rs4925109  | 17 | 17661802  | A | G | 0.316 | 0.021 | 0.008 | 2.80E-12 | -0.002 | 0.018 | 3.27E-01 |
| rs4929965  | 11 | 2197286   | A | G | 0.383 | 0.029 | 0.008 | 4.00E-26 | -0.017 | 0.017 | 3.86E-01 |
| rs4932265  | 15 | 90423293  | T | C | 0.267 | 0.029 | 0.008 | 4.20E-20 | 0.021  | 0.026 | 2.57E-01 |
| rs4946812  | 6  | 107431688 | G | A | 0.674 | 0.017 | 0.005 | 8.20E-09 | -0.023 | 0.024 | 6.75E-01 |
| rs4977213  | 8  | 145507304 | C | T | 0.375 | 0.021 | 0.008 | 9.10E-14 | 0.010  | 0.024 | 3.75E-01 |
| rs505922   | 9  | 136149229 | C | T | 0.332 | 0.021 | 0.008 | 3.90E-12 | -0.016 | 0.018 | 3.57E-01 |
| rs5213     | 11 | 17408404  | C | T | 0.362 | 0.029 | 0.008 | 3.50E-27 | 0.028  | 0.018 | 3.53E-01 |
| rs539515   | 1  | 177889025 | C | A | 0.198 | 0.021 | 0.008 | 1.60E-10 | 0.032  | 0.021 | 1.87E-01 |
| rs55653563 | 9  | 97001682  | A | C | 0.732 | 0.017 | 0.008 | 2.20E-09 | 0.027  | 0.019 | 7.33E-01 |
| rs56348580 | 12 | 121432117 | G | C | 0.689 | 0.021 | 0.008 | 2.30E-13 | 0.026  | 0.018 | 6.99E-01 |
| rs58432198 | 1  | 51256091  | C | T | 0.881 | 0.029 | 0.010 | 2.10E-10 | -0.091 | 0.027 | 8.85E-01 |
| rs58730668 | 4  | 185717759 | T | C | 0.858 | 0.029 | 0.010 | 1.30E-13 | 0.029  | 0.026 | 8.56E-01 |
| rs601945   | 6  | 32573415  | G | A | 0.178 | 0.025 | 0.010 | 4.70E-08 | -0.004 | 0.031 | 1.29E-01 |
| rs60276348 | 17 | 62203304  | T | C | 0.140 | 0.021 | 0.010 | 2.60E-08 | -0.074 | 0.036 | 1.40E-01 |
| rs6070625  | 20 | 57394628  | G | C | 0.517 | 0.021 | 0.005 | 5.30E-14 | 0.000  | 0.017 | 5.33E-01 |
| rs61676547 | 17 | 65892507  | C | G | 0.192 | 0.025 | 0.008 | 2.90E-11 | 0.022  | 0.021 | 1.95E-01 |
| rs62007683 | 14 | 103894071 | G | T | 0.653 | 0.017 | 0.008 | 3.10E-08 | -0.022 | 0.023 | 6.33E-01 |
| rs62080313 | 18 | 36278709  | C | T | 0.123 | 0.025 | 0.010 | 1.00E-08 | -0.016 | 0.025 | 1.29E-01 |
| rs62271373 | 3  | 150066540 | A | T | 0.055 | 0.037 | 0.015 | 1.00E-09 | -0.021 | 0.052 | 5.20E-02 |
| rs6458354  | 6  | 43814190  | C | T | 0.289 | 0.021 | 0.008 | 2.10E-12 | -0.004 | 0.019 | 2.90E-01 |
| rs6459733  | 7  | 156930550 | G | C | 0.673 | 0.025 | 0.005 | 2.40E-17 | -0.011 | 0.019 | 6.67E-01 |
| rs6518681  | 22 | 30609554  | G | A | 0.914 | 0.037 | 0.013 | 1.10E-12 | 0.016  | 0.031 | 9.22E-01 |
| rs67232546 | 11 | 128398938 | T | C | 0.207 | 0.025 | 0.008 | 1.30E-11 | 0.015  | 0.022 | 2.01E-01 |
| rs6780171  | 3  | 185503456 | A | T | 0.314 | 0.057 | 0.010 | 9.00E-56 | 0.005  | 0.018 | 3.08E-01 |
| rs6821438  | 4  | 95091911  | A | G | 0.534 | 0.017 | 0.008 | 4.00E-11 | 0.020  | 0.017 | 5.32E-01 |
| rs6976111  | 7  | 117495667 | A | C | 0.313 | 0.017 | 0.008 | 1.20E-08 | 0.022  | 0.018 | 3.21E-01 |
| rs7022807  | 9  | 19067833  | G | A | 0.401 | 0.017 | 0.005 | 2.70E-10 | -0.018 | 0.017 | 3.88E-01 |
| rs702634   | 5  | 53271420  | A | G | 0.690 | 0.021 | 0.008 | 7.70E-14 | -0.005 | 0.018 | 6.96E-01 |
| rs703972   | 10 | 80952826  | G | C | 0.533 | 0.029 | 0.008 | 1.70E-29 | 0.019  | 0.017 | 5.38E-01 |
| rs71372253 | 17 | 29413019  | C | T | 0.064 | 0.033 | 0.013 | 4.40E-08 | -0.091 | 0.047 | 6.20E-02 |
| rs7178762  | 15 | 63871292  | C | T | 0.460 | 0.017 | 0.005 | 5.40E-10 | -0.013 | 0.018 | 4.64E-01 |
| rs7222481  | 17 | 9785187   | C | G | 0.324 | 0.017 | 0.005 | 1.40E-08 | 0.002  | 0.025 | 2.97E-01 |
| rs72802342 | 16 | 75234872  | C | A | 0.923 | 0.068 | 0.015 | 4.00E-32 | 0.051  | 0.044 | 9.25E-01 |
| rs72926932 | 18 | 53050646  | C | A | 0.084 | 0.037 | 0.013 | 1.00E-14 | 0.000  | 0.031 | 8.20E-02 |
| rs738408   | 22 | 44324730  | T | C | 0.226 | 0.021 | 0.010 | 1.40E-10 | 0.048  | 0.021 | 2.23E-01 |
| rs7629630  | 3  | 168218841 | A | T | 0.857 | 0.021 | 0.010 | 2.50E-08 | 0.015  | 0.033 | 8.59E-01 |
| rs7669833  | 4  | 153513369 | T | A | 0.705 | 0.025 | 0.008 | 1.20E-14 | -0.013 | 0.025 | 7.13E-01 |
| rs7719891  | 5  | 86577352  | G | A | 0.259 | 0.017 | 0.008 | 2.40E-08 | 0.024  | 0.020 | 2.66E-01 |
| rs77464186 | 11 | 72460398  | A | C | 0.836 | 0.045 | 0.010 | 4.70E-33 | 0.003  | 0.024 | 8.40E-01 |
| rs7756992  | 6  | 20679709  | G | A | 0.274 | 0.061 | 0.010 | 2.40E-88 | 0.021  | 0.019 | 2.80E-01 |
| rs77864822 | 12 | 97848775  | A | G | 0.932 | 0.033 | 0.015 | 1.10E-08 | -0.029 | 0.035 | 9.31E-01 |
| rs7987740  | 13 | 109947213 | T | C | 0.609 | 0.017 | 0.008 | 4.00E-08 | 0.011  | 0.018 | 6.06E-01 |
| rs8010382  | 14 | 91963722  | G | A | 0.421 | 0.017 | 0.005 | 6.50E-09 | 0.032  | 0.018 | 4.20E-01 |
| rs80147536 | 2  | 43698028  | A | T | 0.904 | 0.053 | 0.013 | 2.70E-29 | 0.021  | 0.029 | 9.08E-01 |
| rs8037894  | 15 | 62394264  | G | C | 0.566 | 0.021 | 0.008 | 2.60E-13 | 0.020  | 0.018 | 5.62E-01 |
| rs8107974  | 19 | 19388500  | T | A | 0.077 | 0.041 | 0.013 | 3.30E-15 | 0.007  | 0.031 | 7.80E-02 |
| rs878521   | 7  | 44255643  | A | G | 0.245 | 0.025 | 0.008 | 1.90E-13 | -0.027 | 0.027 | 2.49E-01 |
| rs9430095  | 1  | 206593900 | C | G | 0.494 | 0.017 | 0.008 | 1.90E-08 | -0.019 | 0.023 | 4.95E-01 |
| rs9494624  | 6  | 137300960 | A | G | 0.290 | 0.017 | 0.008 | 6.10E-09 | 0.010  | 0.026 | 2.90E-01 |
| rs9563615  | 13 | 59077406  | A | T | 0.710 | 0.021 | 0.008 | 6.40E-11 | 0.011  | 0.019 | 7.13E-01 |
| rs9687832  | 5  | 55861595  | A | G | 0.198 | 0.033 | 0.010 | 1.70E-20 | -0.023 | 0.022 | 1.98E-01 |
| rs9860730  | 3  | 64701146  | A | G | 0.704 | 0.025 | 0.008 | 4.90E-15 | 0.029  | 0.019 | 6.99E-01 |
| rs9873618  | 3  | 170733076 | G | A | 0.710 | 0.029 | 0.008 | 4.80E-21 | 0.000  | 0.025 | 7.07E-01 |
| rs9957145  | 18 | 56876228  | G | A | 0.829 | 0.021 | 0.010 | 8.10E-09 | 0.015  | 0.023 | 8.40E-01 |

Data source: <http://diagram-consortium.org/>

SNP: Single Nucleotide Polymorphism  
Chr: Chromosome  
Pos: Position  
EAF: Effect Allele Frequency  
SE: Standard Error
